# Supplementary material
Source: PubMed Central journal article supplement (PMC3887977)
Supplement: molcell-36-3-267-11-supplementary.pdf [file molcell-36-3-267-11-supplementary.pdf]

**Supplementary Table 1.** Effect of midazolam on the viability of human cancer cell lines.

| Cell Line  | Cell Viability (% of control) at midazolam |            |             |             | GI50* |
|------------|--------------------------------------------|------------|-------------|-------------|-------|
|            | 10 $\mu$ M                                 | 30 $\mu$ M | 100 $\mu$ M | 300 $\mu$ M |       |
| K562       | 88                                         | 76         | 64          | 40          | 171.5 |
| HT29       | 78                                         | 66         | 57          | 26          | 148.5 |
| MDA-MB-231 | 96                                         | 88         | 75          | 53          | >300  |
| NUGC-3     | 102                                        | 100        | 80          | 31          | 201.4 |
| MKN28      | 95                                         | 91         | 85          | 60          | >300  |
| HCT15      | 96                                         | 96         | 95          | 66          | >300  |
| HCT116     | 97                                         | 92         | 75          | 47          | 269.5 |
| A549       | 101                                        | 97         | 81          | 59          | >300  |
| NCI-H23    | 96                                         | 87         | 69          | 23          | 149.7 |
| DU145      | 91                                         | 89         | 71          | 31          | 175.0 |
| PC-3       | 96                                         | 99         | 81          | 43          | 251.1 |
| SK-OV-3    | 98                                         | 94         | 82          | 52          | >300  |
| Caki-1     | 93                                         | 91         | 74          | 43          | 240.1 |

\* GI50 was calculated as the concentration ( $\mu$ M) of midazolam that achieved 50% growth inhibition of cells.
